# Supplementary material for: Risk assessment of a highly pathogenic H5N1 influenza virus from mink
Source: PubMed Central journal article supplement (PMC11096306; doi:10.1038/s41467-024-48475-y), 2024-05-15
Supplement: 41467_2024_48475_MOESM1_ESM.pdf [file 41467_2024_48475_MOESM1_ESM.pdf]

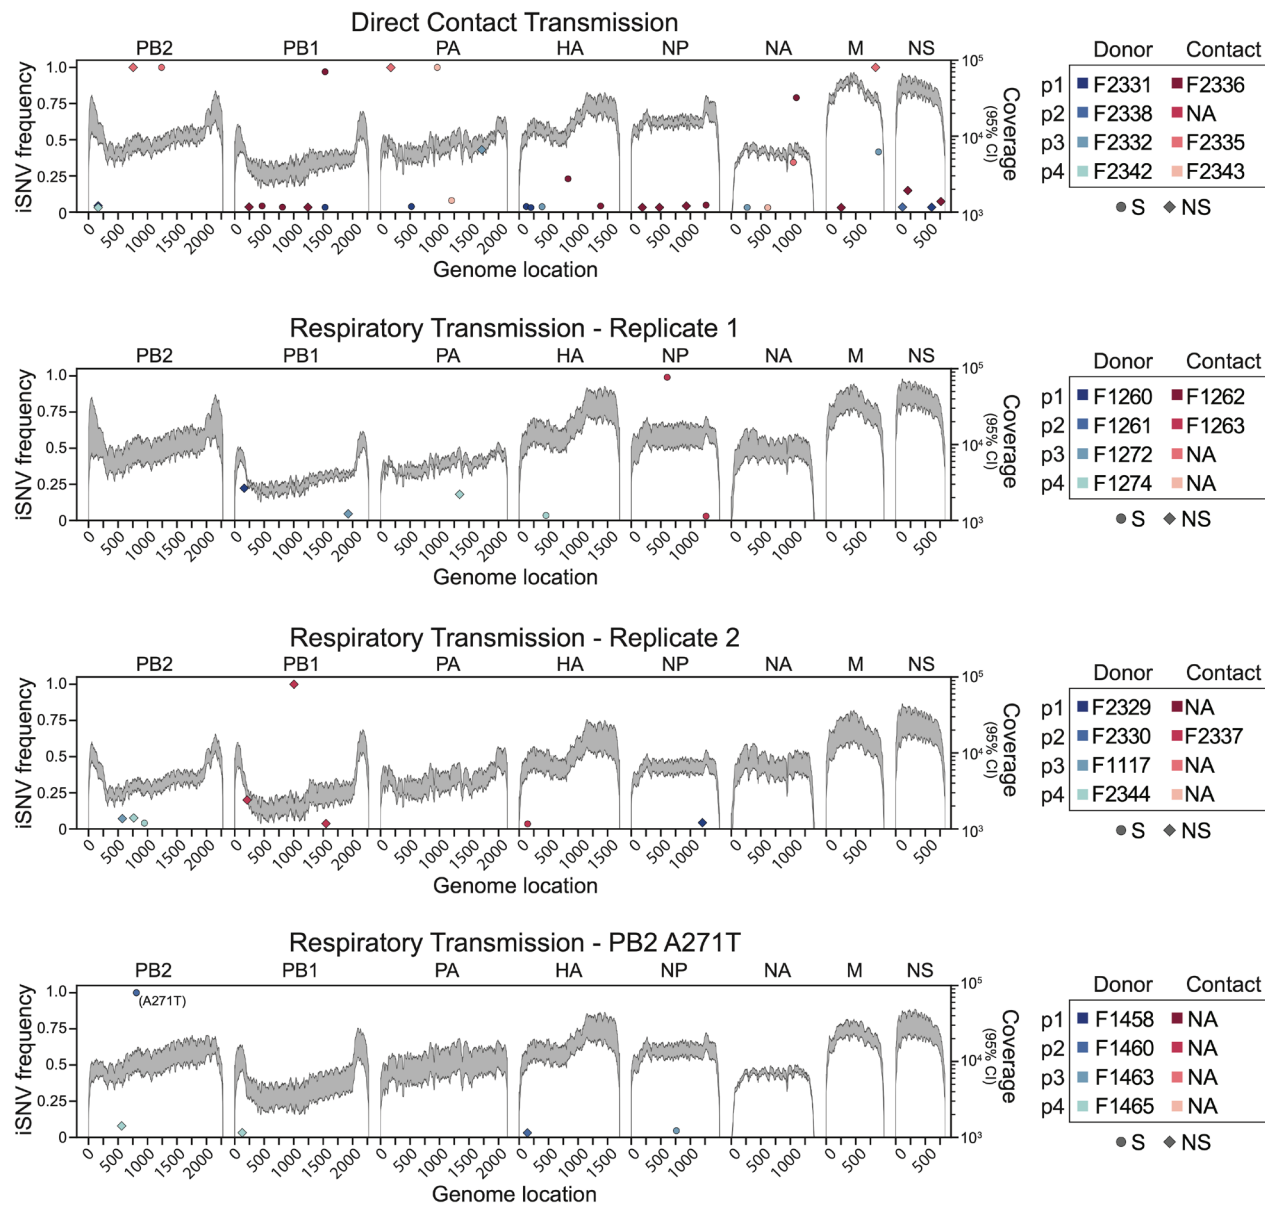

**Figure S1. Intra-host Single-Nucleotide Variants (iSNV) in A/mink (H5N1) shed by infected donor and contact ferrets during transmission experiments.** Shown are the iSNV identified and sequencing coverage across the full viral genome in nasal wash samples at the time of peak viral replication for individual animals. vRNA was isolated from nasal wash samples and subject to next-generation sequencing. Top panel displays iSNVs identified during contact transmission of wild-type A/mink (H5N1). Middle panels show iSNVs identified during airborne transmission study 1 and 2 with wild-type A/mink (H5N1), respectively. Bottom panel displays iSNV identified during airborne transmission of A/mink (H5N1) with PB2 A271T. Individual donor and contact ferrets are represented in each panel by different shades of blue and red, respectively. Non-synonymous mutations are denoted by diamond symbols, and synonymous mutations are denoted by circle symbols.



|                                            |                    |                  |                         |                                                                   |               |  |  |          |          |          |  |                        |  |
|--------------------------------------------|--------------------|------------------|-------------------------|-------------------------------------------------------------------|---------------|--|--|----------|----------|----------|--|------------------------|--|
|                                            | Synonymous         | PB2<br>HA        | T947C<br>C144T          | PB2-315G (S)<br>HA-48L (S)                                        | G<br>L        |  |  |          | 0.04 (L) |          |  | 0.04 (G)               |  |
| Respiratory<br>Transmission -<br>PB2 A271T | Non-<br>Synonymous | PB2<br>PB1<br>HA | G561A<br>T127C<br>A141T | PB2-E187K (NS)<br>PB1-V42A (NS), PB1-F2-S11P (NS)<br>HA-I47L (NS) | E<br>V,S<br>I |  |  | 0.03 (L) |          |          |  | 0.08 (K)<br>0.03 (A,P) |  |
|                                            | Synonymous         | NP               | C764T                   | NP-254D (S)                                                       | D             |  |  |          |          | 0.05 (D) |  |                        |  |

**Notes**

Viral RNA was isolated from the nasal wash of each animal at the time of peak viral shedding.

Grey shading denotes no transmission to contact

Red font indicates mutations non-synonymous mutations present at a frequency greater than or equal to 5%

\* denotes mutation also confers a synonymous change in another gene expressed from this segment.

\*\* denotes mutation also confers a non-synonymous change in another gene expressed from this segment.

**Table S2. Maximum change in ferret body temperature during dose de-escalation study.**

| <b>Group</b>          | <b>Ferret Number</b>    | <b>Baseline Temp. (°C)</b> | <b>Maximum Temp. (°C)</b> | <b>Change in Temp. (°C) from Baseline</b> | <b>Day (p.i.) of Maximum Temp.</b> |
|-----------------------|-------------------------|----------------------------|---------------------------|-------------------------------------------|------------------------------------|
| <b>10<sup>0</sup></b> | <b>1265*</b>            | <b>37.9</b>                | <b>38.9</b>               | <b>1.0</b>                                | <b>1</b>                           |
|                       | <b>382</b>              | <b>37.8</b>                | <b>40.3</b>               | <b>2.5</b>                                | <b>6</b>                           |
|                       | <b>1279</b>             | <b>39.0</b>                | <b>41.1</b>               | <b>2.1</b>                                | <b>3</b>                           |
|                       | <b>1283</b>             | <b>37.2</b>                | <b>40.1</b>               | <b>2.9</b>                                | <b>7</b>                           |
| <b>10<sup>1</sup></b> | <b>1267</b>             | <b>37.6</b>                | <b>39.7</b>               | <b>2.1</b>                                | <b>4</b>                           |
|                       | <b>1268</b>             | <b>38.7</b>                | <b>41</b>                 | <b>2.3</b>                                | <b>5</b>                           |
|                       | <b>1282</b>             | <b>39.0</b>                | <b>40.7</b>               | <b>1.7</b>                                | <b>6</b>                           |
|                       | <b>1285</b>             | <b>38.6</b>                | <b>40.8</b>               | <b>2.2</b>                                | <b>5</b>                           |
| <b>10<sup>2</sup></b> | <b>1264</b>             | <b>38.7</b>                | <b>40.7</b>               | <b>2.0</b>                                | <b>6</b>                           |
|                       | <b>1266</b>             | <b>38.6</b>                | <b>39.8</b>               | <b>1.2</b>                                | <b>3</b>                           |
|                       | <b>1277</b>             | <b>39.4</b>                | <b>40.6</b>               | <b>1.2</b>                                | <b>4</b>                           |
|                       | <b>1278</b>             | <b>38.4</b>                | <b>40.6</b>               | <b>2.2</b>                                | <b>3</b>                           |
| <b>10<sup>3</sup></b> | <b>1256</b>             | <b>38.3</b>                | <b>40.5</b>               | <b>2.2</b>                                | <b>7</b>                           |
|                       | <b>1258</b>             | <b>37.2</b>                | <b>39.5</b>               | <b>2.3</b>                                | <b>6</b>                           |
|                       | <b>1270</b>             | <b>38.2</b>                | <b>41.2</b>               | <b>3</b>                                  | <b>5</b>                           |
|                       | <b>1276<sup>#</sup></b> | <b>38.2</b>                | <b>40.2</b>               | <b>2</b>                                  | <b>6</b>                           |

Notes: \*Did not shed virus or display symptoms, #Shed virus, but did not display symptoms  
 The only symptom that FT 1283 in group 10<sup>0</sup> displayed was fever. The first two ferrets of each group were male and second two were female.

Table S3. Daily clinical scores of ferrets during dose de-escalation study

| Group | Ferret Number | Day 1    |             |       | Day 2    |             |       | Day 3    |             |       | Day 4    |             |       | Day 5    |             |       | Day 6    |             |       | Day 7    |             |       |   |   |   |
|-------|---------------|----------|-------------|-------|----------|-------------|-------|----------|-------------|-------|----------|-------------|-------|----------|-------------|-------|----------|-------------|-------|----------|-------------|-------|---|---|---|
|       |               | Activity | Respiratory | Other | Activity | Respiratory | Other | Activity | Respiratory | Other | Activity | Respiratory | Other | Activity | Respiratory | Other | Activity | Respiratory | Other | Activity | Respiratory | Other |   |   |   |
| 10^0  | 1265          | 0        | 0           | 0     | 0        | 0           | 0     | 0        | 0           | 0     | 0        | 0           | 0     | 0        | 0           | 0     | 0        | 0           | 0     | 0        | 0           | 0     | 0 | 0 | 0 |
|       | 382           | 0        | 0           | 0     | 0        | 0           | 0     | 0        | 0           | 0     | 0        | 0           | 0     | 0        | 0           | 0     | 0        | 0           | 0     | 0        | 0           | 0     | 0 | 1 | 2 |
|       | 1279          | 0        | 0           | 0     | 0        | 0           | 0     | 0        | 0           | 0     | 1        | 0           | 0     | 1        | 0           | 0     | 1        | 0           | 0     | 1        | 0           | 0     | 1 | 0 | 1 |
|       | 1283          | 0        | 0           | 0     | 0        | 0           | 0     | 0        | 0           | 0     | 0        | 0           | 0     | 0        | 0           | 0     | 0        | 0           | 0     | 0        | 0           | 0     | 0 | 0 | 0 |
| 10^1  | 1267          | 0        | 0           | 0     | 0        | 0           | 0     | 0        | 0           | 0     | 1        | 0           | 0     | 1        | 0           | 0     | 1        | 0           | 0     | 1        | 0           | 0     | 1 | 1 | 2 |
|       | 1268          | 0        | 0           | 0     | 0        | 0           | 0     | 0        | 0           | 0     | 0        | 0           | 0     | 1        | 0           | 0     | 0        | 0           | 0     | 0        | 0           | 0     | 0 | 0 | 0 |
|       | 1282          | 0        | 0           | 0     | 0        | 0           | 0     | 0        | 0           | 0     | 0        | 0           | 0     | 0        | 0           | 0     | 0        | 0           | 0     | 0        | 0           | 0     | 0 | 0 | 0 |
|       | 1285          | 0        | 0           | 0     | 0        | 0           | 0     | 0        | 0           | 0     | 0        | 0           | 0     | 0        | 0           | 0     | 0        | 0           | 0     | 0        | 1           | 0     | 0 | 0 | 1 |
| 10^2  | 1264          | 0        | 0           | 0     | 0        | 0           | 0     | 0        | 0           | 0     | 0        | 0           | 0     | 0        | 0           | 0     | 0        | 0           | 0     | 0        | 0           | 0     | 3 | 3 | 3 |
|       | 1266          | 0        | 0           | 0     | 0        | 0           | 0     | 0        | 0           | 0     | 0        | 0           | 0     | 0        | 0           | 0     | 0        | 0           | 0     | 0        | 0           | 0     | 0 | 0 | 2 |
|       | 1277          | 0        | 0           | 0     | 0        | 0           | 0     | 0        | 0           | 0     | 0        | 0           | 0     | 0        | 0           | 1     | 0        | 0           | 2     | 0        | 0           | 2     | 0 | 0 | 2 |
|       | 1278          | 0        | 0           | 0     | 0        | 0           | 0     | 0        | 0           | 0     | 0        | 0           | 0     | 0        | 0           | 1     | 0        | 0           | 0     | 0        | 0           | 0     | 0 | 0 | 0 |
| 10^3  | 1256          | 0        | 0           | 0     | 0        | 0           | 0     | 0        | 0           | 0     | 0        | 0           | 0     | 0        | 0           | 0     | 1        | 0           | 0     | 2        | 0           | 0     | 2 | 0 | 0 |
|       | 1258          | 0        | 0           | 0     | 0        | 0           | 0     | 0        | 0           | 0     | 0        | 0           | 0     | 0        | 0           | 2     | 1        | 1           | 2     | 1        | 1           | 2     | 1 | 1 | 2 |
|       | 1270          | 0        | 0           | 0     | 0        | 0           | 0     | 0        | 0           | 0     | 0        | 0           | 0     | 0        | 0           | 0     | 1        | 0           | 0     | 1        | 0           | 0     | 1 | 0 | 0 |
|       | 1276          | 0        | 0           | 0     | 0        | 0           | 0     | 0        | 0           | 0     | 0        | 0           | 0     | 0        | 0           | 0     | 0        | 0           | 0     | 0        | 0           | 0     | 0 | 0 | 0 |

  

| Group | Ferret Number | Day 8    |             |       | Day 9    |             |       | Day 10   |             |       | Day 11   |             |       | Day 12   |             |       | Day 13   |             |       | Day 14   |             |       |   |   |   |
|-------|---------------|----------|-------------|-------|----------|-------------|-------|----------|-------------|-------|----------|-------------|-------|----------|-------------|-------|----------|-------------|-------|----------|-------------|-------|---|---|---|
|       |               | Activity | Respiratory | Other | Activity | Respiratory | Other | Activity | Respiratory | Other | Activity | Respiratory | Other | Activity | Respiratory | Other | Activity | Respiratory | Other | Activity | Respiratory | Other |   |   |   |
| 10^0  | 1265          | 0        | 0           | 0     | 0        | 0           | 0     | 0        | 0           | 0     | 0        | 0           | 0     | 0        | 0           | 0     | 0        | 0           | 0     | 0        | 0           | 0     | 0 | 0 | 0 |
|       | 382           | 0        | 1           | 2     | 1        | 0           | 2     | 1        | 0           | 2     | 3        | 1           | 0     |          |             |       |          |             |       |          |             |       |   |   |   |
|       | 1279          | 1        | 0           | 0     | 3        | 0           | 3     |          |             |       |          |             |       |          |             |       |          |             |       |          |             |       |   |   |   |
|       | 1283          | 0        | 0           | 0     | 0        | 0           | 0     | 0        | 0           | 0     | 0        | 0           | 0     | 0        | 0           | 0     | 0        | 0           | 0     | 0        | 0           | 0     | 0 | 0 | 0 |
| 10^1  | 1267          | 2        | 1           | 2     | 3        | 3           | 3     |          |             |       |          |             |       |          |             |       |          |             |       |          |             |       |   |   |   |
|       | 1268          | 2        | 0           | 3     |          |             |       |          |             |       |          |             |       |          |             |       |          |             |       |          |             |       |   |   |   |
|       | 1282          | 0        | 0           | 0     | 3        | 3           | 3     |          |             |       |          |             |       |          |             |       |          |             |       |          |             |       |   |   |   |
|       | 1285          | 2        | 0           | 0     |          |             |       |          |             |       |          |             |       |          |             |       |          |             |       |          |             |       |   |   |   |
| 10^2  | 1264          |          |             |       |          |             |       |          |             |       |          |             |       |          |             |       |          |             |       |          |             |       |   |   |   |
|       | 1266          | 0        | 0           | 2     | 3        | 3           | 3     |          |             |       |          |             |       |          |             |       |          |             |       |          |             |       |   |   |   |
|       | 1277          | 0        | 0           | 2     | 3        | 0           | 3     |          |             |       |          |             |       |          |             |       |          |             |       |          |             |       |   |   |   |
|       | 1278          | 0        | 0           | 2     | 0        | 0           | 2     |          |             |       |          |             |       |          |             |       |          |             |       |          |             |       |   |   |   |
| 10^3  | 1256          | 2        | 1           | 0     | 2        | 3           | 2     |          |             |       |          |             |       |          |             |       |          |             |       |          |             |       |   |   |   |
|       | 1258          | 2        | 1           | 2     | 2        | 2           | 3     |          |             |       |          |             |       |          |             |       |          |             |       |          |             |       |   |   |   |
|       | 1270          | 2        | 0           | 0     | 2        | 2           | 3     |          |             |       |          |             |       |          |             |       |          |             |       |          |             |       |   |   |   |
|       | 1276          | 0        | 0           | 0     | 0        | 0           | 0     | 0        | 0           | 0     | 0        | 0           | 0     | 0        | 0           | 0     | 0        | 0           | 0     | 0        | 0           | 0     | 0 | 0 | 0 |

Notes: Grey box indicates no clinical score as animal had been euthanized. As described in the "Methods" section, 0 denotes no clinical score and 3 denotes most severe clinical score.

**Table S4. Amino acid differences between select H5N1 strains isolated from mink.**

| Virus Strain                                         | Viral Protein |     |     |     |          |          |          |          |                |          | Collection Date<br>(year-month-day) |
|------------------------------------------------------|---------------|-----|-----|-----|----------|----------|----------|----------|----------------|----------|-------------------------------------|
|                                                      | PB2           |     | PB1 | PA  |          | NA       | NS1      |          |                | NS2      |                                     |
|                                                      | 138           | 598 | 480 | 349 | 716      | 395      | 73       | 155      | C-terminus     | 74       |                                     |
| <i>A/mink/Spain/3691-8_22VIR10586-10/2022 (H5N1)</i> | R             | T   | K   | E   | K        | A        | S        | A        | -----          | E        | 2022-10-18                          |
| <i>A/mink/Spain/22VIR12774-13_3869-2/2022 (H5N1)</i> | R             | T   | X*  | E   | <u>N</u> | A        | <u>P</u> | A        | <u>WRNEMVD</u> | <u>G</u> | 2022-10-26                          |
| <i>A/mink/Spain/22VIR12774-14_3869-2/2022 (H5N1)</i> | Q             | I   | K   | X*  | K        | <u>I</u> | S        | <u>V</u> | -----          | E        | 2022-10-26                          |

Notes: Italic denotes virus strain used in this manuscript. Sequence alignment of proteins was performed using the 6 sequences published in GISAID for H5N1 viruses recovered during the mink outbreak. Sequence alignment and comparison of amino acid changes were performed using GISAID analyses tools. This table is modified from Maemura et al., 2023<sup>26</sup>. X\* published sequence is ambiguous; however, alignment of the 6 reported virus sequences indicates the consensus amino acids are PB1 480K and PA 349E. Underline indicates amino acids that differ from *A/mink/Spain/3691-8\_22VIR10586-10/2022 (H5N1)*.
